# Supplementary material for: Targeted Identification of Rice Grain-Associated Gene Allelic Variation through Mutation Induction, Targeted Sequencing, and Whole Genome Sequencing Combined with a Mixed-Samples Strategy
Source: Research Square preprint supplement (doi:10.21203/rs.3.rs-1457542/v1), 2022-03-18
Supplement: Supplementary file 1 [file 2e73e7bb6bfb6359af5a9abb.xlsx]

## Sheet: Sheet1
Table S2. Primers for amplifying fragments of the target site.
SNP number	gene	primer(5'to3')
SNP-1	GS3	AGGTGCAGCGGCACGAGCAT
SNP-2	GS3	ATGCCCATCTCCCTCGTTTA
SNP-3	GS3	CAAGAAGACGAGCACCCGTTGCTTACCAG
SNP-4	GS3	GTGCAGCGGCACGAGCATCC
SNP-5	GS3	TGCAGCGGCACGAGCATCCC
SNP-6	GS3	TAACCGCAAGCAGAGCAAGGCAATC
SNP-7	GS3	ACCAATCAGTGCAGCTTCGCTCAATC
SNP-8	GS3	GCCATTCAAAGCAAAGCACC
SNP-9	GS3	CAATCAGTGCAGCTTCGCTCAATCG
SNP-10	GS3	ACCAATCAGTGCAGCTTCGCTCAATC
SNP-11	GS3	TGCAGCGGCACGAGCATCCC
SNP-12	GW5	GGCCGTCTTGAAGTTGAACGCCTCCTG
SNP-13	GW5	ACCAATCAGTGCAGCTTCGCTCAATC
SNP-14	GW5	GCCGTCTTGAAGTTGAACGCCTCCTG
SNP-15	GW5	GCCGTCTTGAAGTTGAACGCCTCCTG
