# Supplementary material for: Targeted Identification of Rice Grain-Associated Gene Allelic Variation through Mutation Induction, Targeted Sequencing, and Whole Genome Sequencing Combined with a Mixed-Samples Strategy
Source: Research Square preprint supplement (doi:10.21203/rs.3.rs-1457542/v1), 2022-03-18
Supplement: Supplementary file 2 [file a55e12e960f7d66886eebc55.xlsx]

## Sheet: Sheet1
Table S1. Targeted sequencing primer information.
gene	primer F	primer R	primer start	insert start	insert end	primer end	length
GS3	ACCTCTCTCCTCCATATAAACCTTT	ATCTCCATGTGCTCTTCCACCTAG	16729346	16729371	16735235	16735259	5914
GW5	TAGGTGCTACTACTTCTACTGTGGA	AGACAACAGCTAGGTTTCATTTTGG	5363904	5363929	5367008	5367033	3130
